# Supplementary material for: Immobilized Trienzymatic System with Enhanced Stabilization for the Biotransformation of Lactose
Source: MDPI journal article supplement (doi:10.3390/molecules22020284), 2017-02-22
Supplement: s1 [file s1]

# Supplementary Materials: Immobilized Trienzymatic System with Enhanced Stabilization for the Biotransformation of Lactose

Pedro Torres and Francisco Batista-Viera

**Table S1.** Kinetics of process for biotransformation of lactose in Mozzarella cheese whey at 50 °C using immobilized tri-enzymatic system.

| System                                        | Time (h) | Tagatose (%) <sup>1</sup> | Fructose (%) <sup>1</sup> |
|-----------------------------------------------|----------|---------------------------|---------------------------|
| Soluble enzymes                               | 0        | 0                         | 0                         |
|                                               | 1        | 7                         | 8                         |
|                                               | 2        | 10                        | 10                        |
|                                               | 3        | 13                        | 13                        |
|                                               | 4        | 16                        | 17                        |
|                                               | 5        | 19                        | 19                        |
|                                               | 6        | 22                        | 21                        |
| Immobilized derivatives<br>(sequential use)   | 0        | 0                         | 0                         |
|                                               | 1        | 10                        | 1                         |
|                                               | 2        | 16                        | 7                         |
|                                               | 3        | 19                        | 10                        |
|                                               | 4        | 21                        | 13                        |
|                                               | 5        | 27                        | 19                        |
|                                               | 6        | 31                        | 24                        |
| Immobilized derivatives<br>(simultaneous use) | 0        | 0                         | 0                         |
|                                               | 1        | 11                        | 5                         |
|                                               | 2        | 17                        | 8                         |
|                                               | 3        | 20                        | 11                        |
|                                               | 4        | 25                        | 17                        |
|                                               | 5        | 33                        | 24                        |
|                                               | 6        | 40                        | 29                        |

<sup>1</sup> Conversion percentage (D-galactose to D-tagatose and D-glucose to D-fructose).

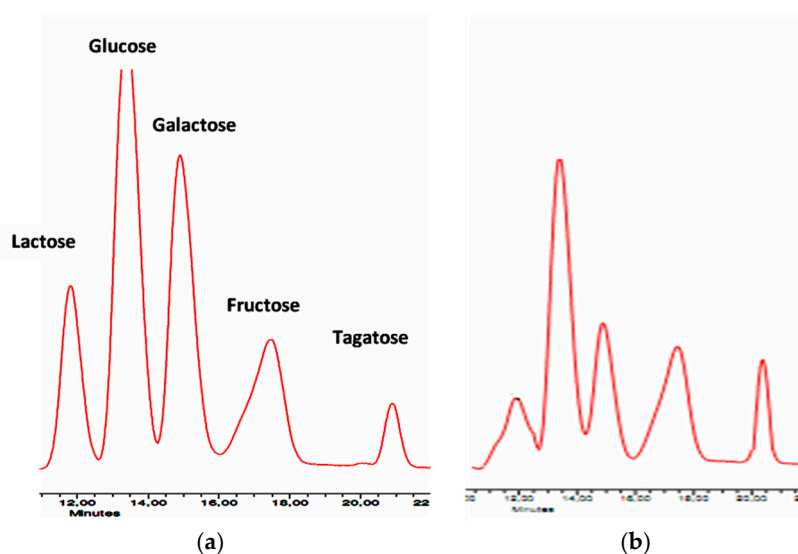

**Figure S1.** HPLC profile of: (a) Sugar standards; (b) Products from simultaneous lactolysis, glucose and galactose isomerization in Mozzarella cheese whey with the trienzymatic system (single enzyme derivative). Reaction time: 6 h.
